# Supplementary material for: Multifunctional lanthanide MOF luminescent sensor built by structural designing and energy level regulation of a ligand
Source: Royal Society of Chemistry journal article supplement (doi:10.1039/d2qi00859a), 2022-01-01
Supplement: d2qi00859a1.pdf [file d2qi00859a1.pdf]

## Electronic Supplementary Information

### Multifunctional Lanthanide MOF luminescent sensor built by structural design and energy level regulation of ligand

*Xueguang Liu<sup>a†</sup>, Wei Liu<sup>\*b†</sup>, Yao Kou<sup>l</sup>, Xiaoshan Yang<sup>a</sup>, Zhenghua Ju<sup>a</sup>,  
Weisheng Liu<sup>\*a</sup>*

<sup>a</sup>Key Laboratory of Nonferrous Metal Chemistry and Resources Utilization of Gansu Province and State Key Laboratory of Applied Organic Chemistry, Key Laboratory of Special Function Materials and Structure Design, Ministry of Education, College of Chemistry and Chemical Engineering, Lanzhou University, Lanzhou 730000, China. Lanzhou 730000 (P.R. China). \*E-mail: [liuws@lzu.edu.cn](mailto:liuws@lzu.edu.cn).

<sup>b</sup>Institute of National Nuclear Industry, Frontiers Science Center for Rare Isotope, School of Nuclear Science and Technology, Key Laboratory of Special Function Materials and Structure Design, Ministry of Education, Lanzhou University, 730000, Lanzhou, China.

<sup>†</sup>These authors contributed equally to this work.

\* Corresponding authors:

E-mail for Weisheng Liu: [liuws@lzu.edu.cn](mailto:liuws@lzu.edu.cn)

\* Corresponding authors:

E-mail for Wei Liu: [l\\_w@lzu.edu.cn](mailto:l_w@lzu.edu.cn)

**Materials and Instrumentation:** All solvents and reagents were commercially available A.R. grade and used without further purification unless otherwise noted. Preparation of stock solutions: All the analytic nitro explosives solutions were prepared by separately dissolving each of them in DMAC with a concentration of 0.1 M and 0.01M. Luminescence spectra were measured using a Hitachi F-7000 luminescence spectrometer. Fluorescent quantum yield was determined by an absolute method using an integrating sphere on FLS920 of Edinburgh Instrument. UV-visible spectra were recorded using an Agilent Cary 5000 spectrophotometer. The FT-IR spectra were recorded from KBr pellets in the range from 4000 to 500  $\text{cm}^{-1}$  on a Bruker VERTEX 70 spectrometer. Powder X-Ray diffraction (PXRD) patterns were collected with a PANalytical X'Pert Pro Diffractometer operated at 40 kV and 40 mA with Cu  $K\alpha$  radiation. Thermogravimetric analyses (TGA) were obtained on a NETZSCH STA 449 F3 Jupiter® under a  $\text{N}_2$  atmosphere.

**X-ray Structural Crystallography:** The single-crystal X-ray diffraction data was collected on a XtaLAB Synergy R, DW system, HyPix diffractometer. The crystal was kept at 149.99(10) K during data collection. Using Olex2<sup>[1]</sup>, the structure was solved with the SHELXT<sup>[2]</sup> structure solution program using Intrinsic Phasing and refined with the SHELXL<sup>[3]</sup> refinement package using Least Squares minimisation.

1. Dolomanov, O.V., Bourhis, L.J., Gildea, R.J., Howard, J.A.K. & Puschmann, H. (2009), *J. Appl. Cryst.* 42, 339-341.
2. Sheldrick, G.M. (2015). *Acta Cryst.* A71, 3-8.
3. Sheldrick, G.M. (2015). *Acta Cryst.* C71, 3-8.

**Calculations of Luminescent Quantum Yield:** Luminescent quantum yield data was measured in the solid state at 298K, and the emission was monitored from 450 to 650 nm. The overall luminescent quantum yields of the solid-state samples were determined by an absolute method using an integrating sphere on FLS920 of Edinburgh Instrument (150 mm diameter,  $\text{BaSO}_4$  coating) and acquired using the following equation:

$$\Phi_{\text{overall}} = (A_H) / (R_{\text{ST}} - R_H) \quad (\text{S1})$$

where  $A_H$  is the area under emission spectrum of the sample and  $R_{\text{ST}}$  and  $R_H$  are diffuse reflectance of the reflecting standard and the sample, respectively<sup>[1-2]</sup>.

**Additional Figures and Schemes:**

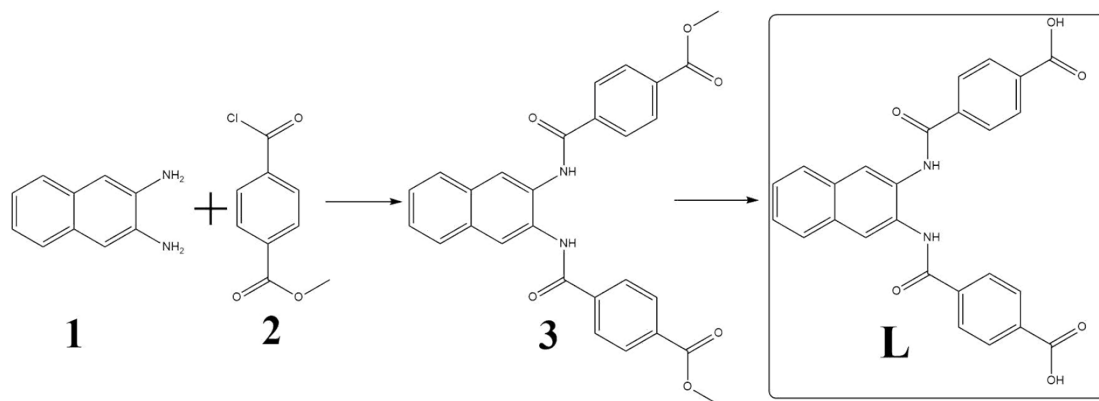

**Scheme S1.** Synthesis of L

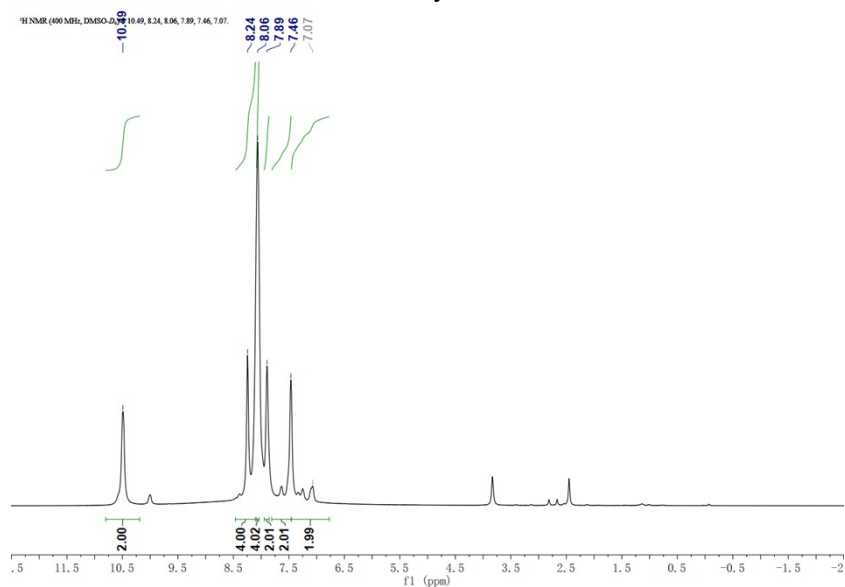

**Fig S1.** <sup>1</sup>H NMR spectra of L<sup>2-</sup> recorded in DMSO.

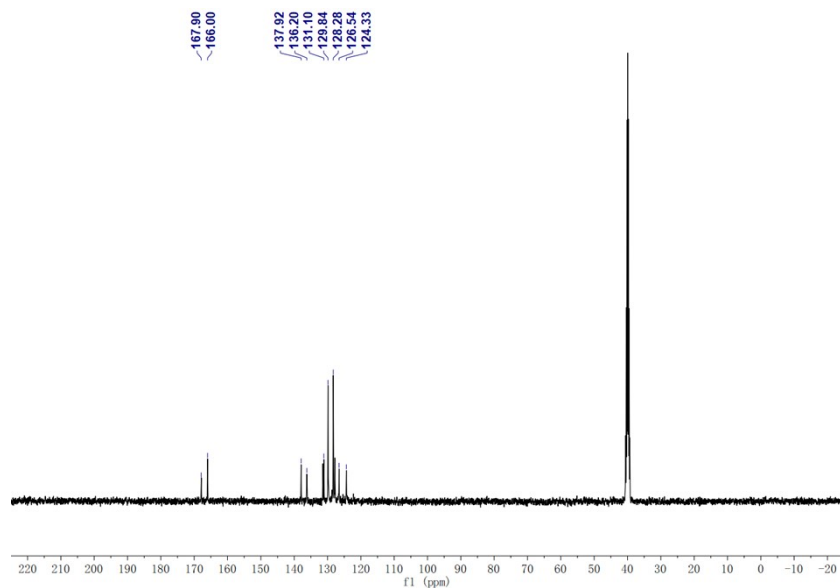

Fig S2.  $^{13}\text{C}$  NMR spectra of  $\text{L}^{2-}$  recorded in DMSO.

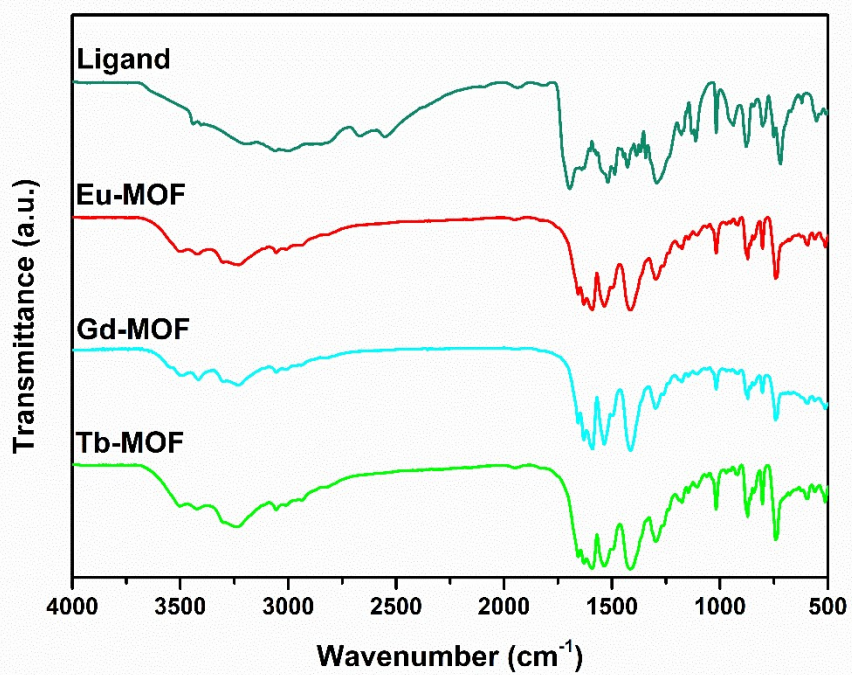

Fig S3. IR spectra of the Ln-MOFs and the ligand.

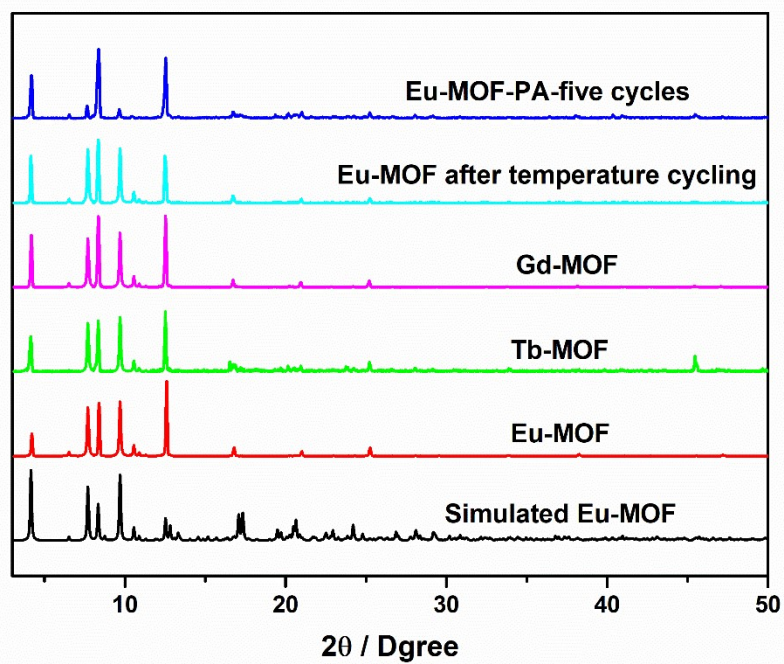

**Fig S4.** The PXR D patterns of the Ln-MOF (Ln = Eu, Tb, Gd) and the Eu-MOF after five cycles experiment for detecting PA and temperature sensing.

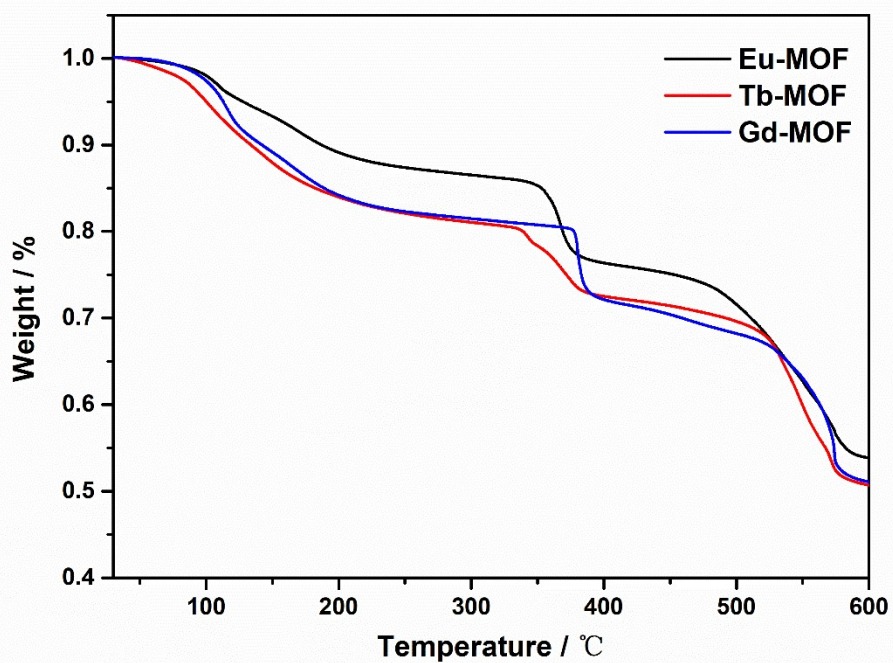

**Fig S5.** TGA plot of the Ln-MOF (Ln = Eu, Tb, Gd)

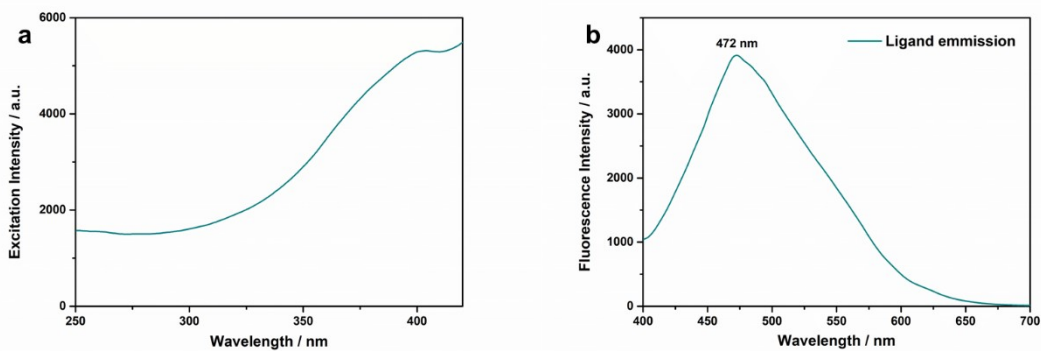

**Fig S6.** (a) The solid-state excitation spectrum of the ligand at room temperature ( $\lambda_{em} = 472$  nm).  
 (b) The solid-state emission spectrum of the ligand at room temperature ( $\lambda_{ex} = 365$  nm).

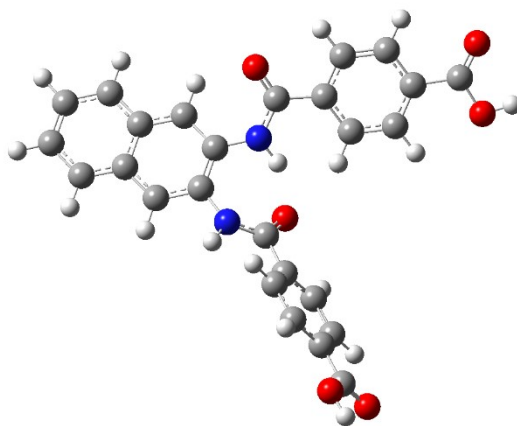

**Fig S7.** The optimized geometry of the free ligand

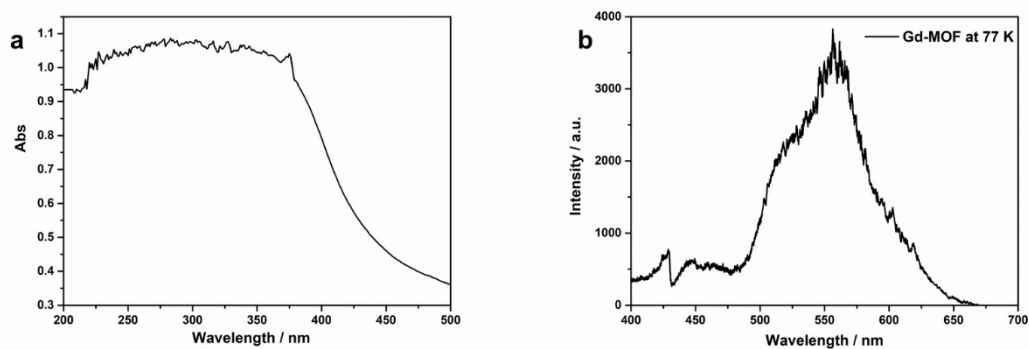

**Fig S8.** (a) UV-Vis absorption spectrum of the ligand. (b) phosphorescence spectrum of the Gd-MOF at 77K.

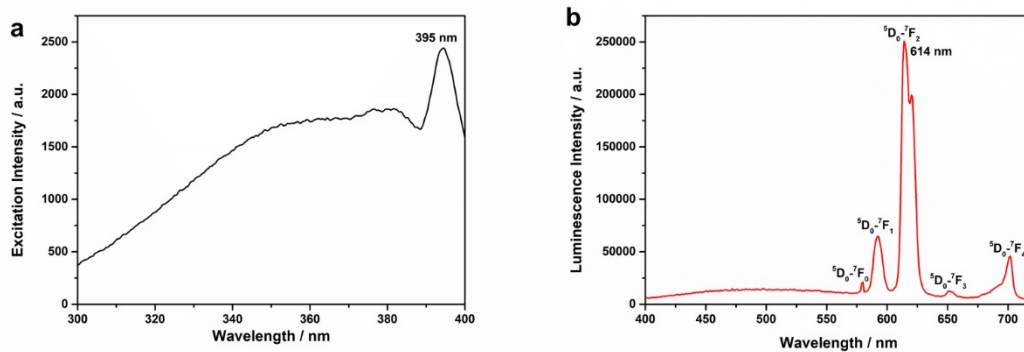

**Fig S9.** (a) The solid-state excitation spectrum of the Eu-MOF at room temperature ( $\lambda_{em} = 614$  nm). (b) The solid-state emission spectrum of the Eu-MOF at room temperature ( $\lambda_{ex} = 365$  nm).

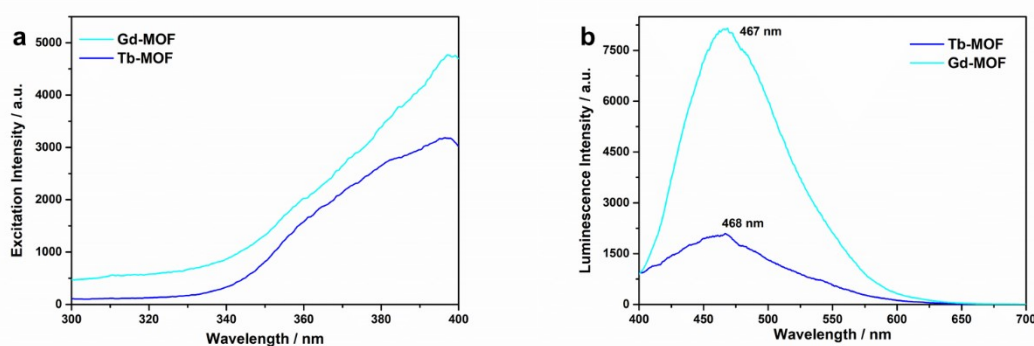

**Fig S10.** (a) The solid-state excitation spectra of the Tb-MOF and Gd-MOF at room temperature ( $\lambda_{em} = 468$  nm). (b) The solid-state emission spectra of the Tb-MOF and Gd-MOF at room temperature ( $\lambda_{ex} = 365$  nm).

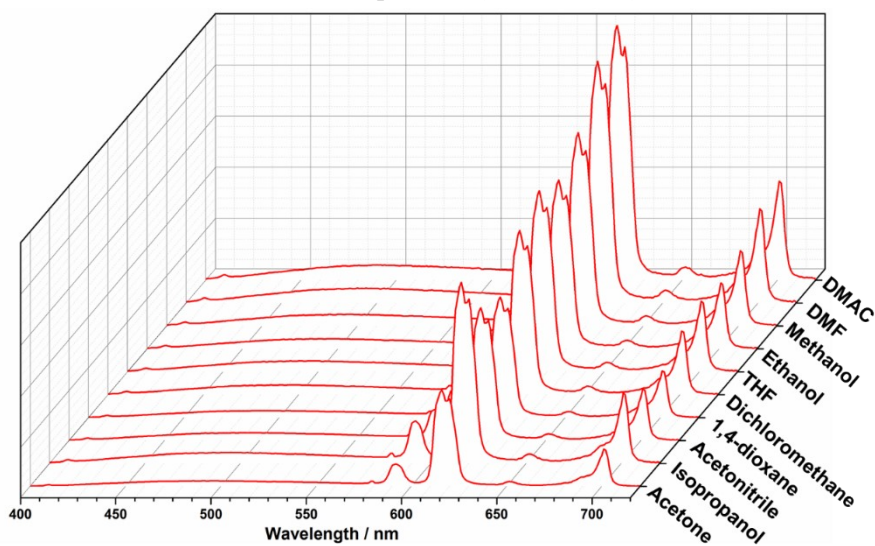

**Fig S11.** The luminescence spectra of the Eu-MOF in different organic solvents.

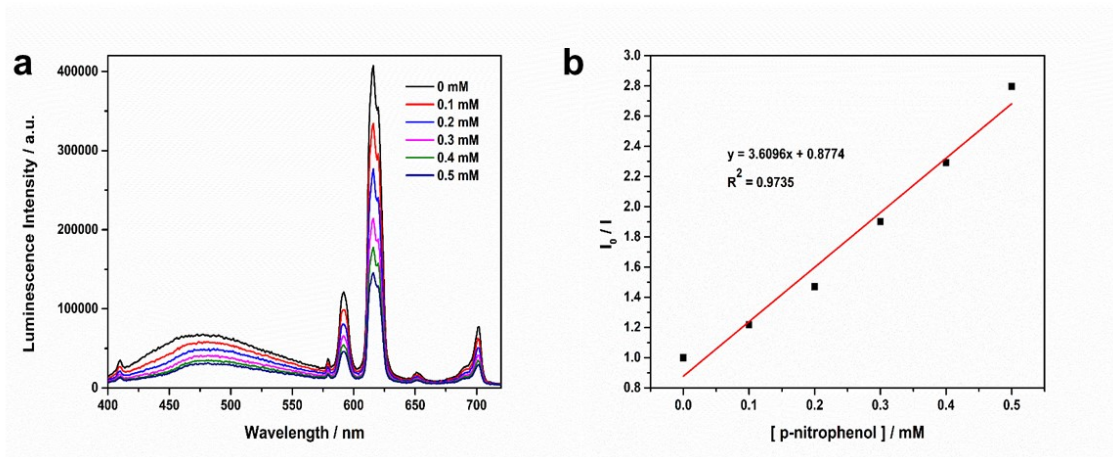

**Fig S12.** (a) The luminescence spectra of the Eu-MOF recorded with different concentrations of p-nitrophenol (0-0.5 mM) in DMAC. (b) SV plot of  $I_0/I$  vs increasing concentrations of p-nitrophenol.

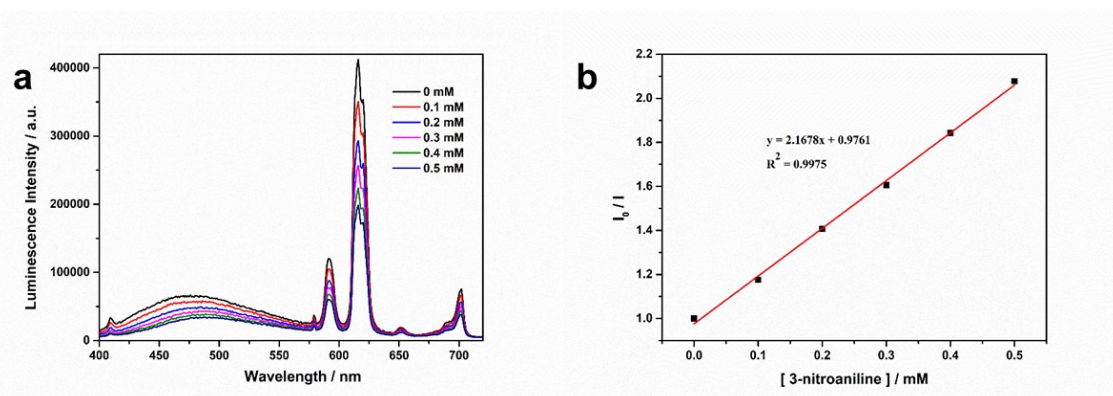

**Fig S13.** (a) The luminescence spectra of the Eu-MOF recorded with different concentrations of 3-nitroaniline (0-0.5 mM) in DMAC. (b) SV plot of  $I_0/I$  vs increasing concentrations of 3-nitroaniline.

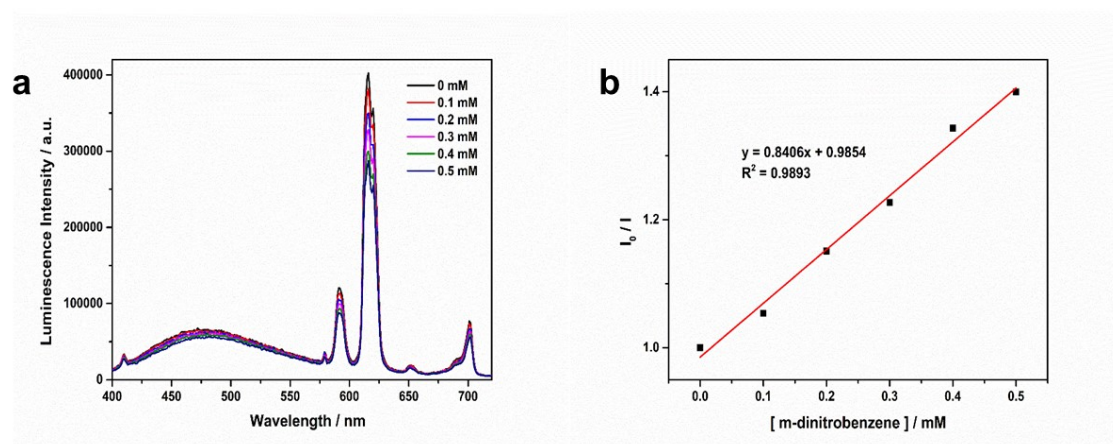

**Fig S14.** (a) The luminescence spectra of the Eu-MOF recorded with different concentrations of m-dinitrobenzene (0-0.5 mM) in DMAC. (b) SV plot of  $I_0/I$  vs increasing concentrations of m-dinitrobenzene.



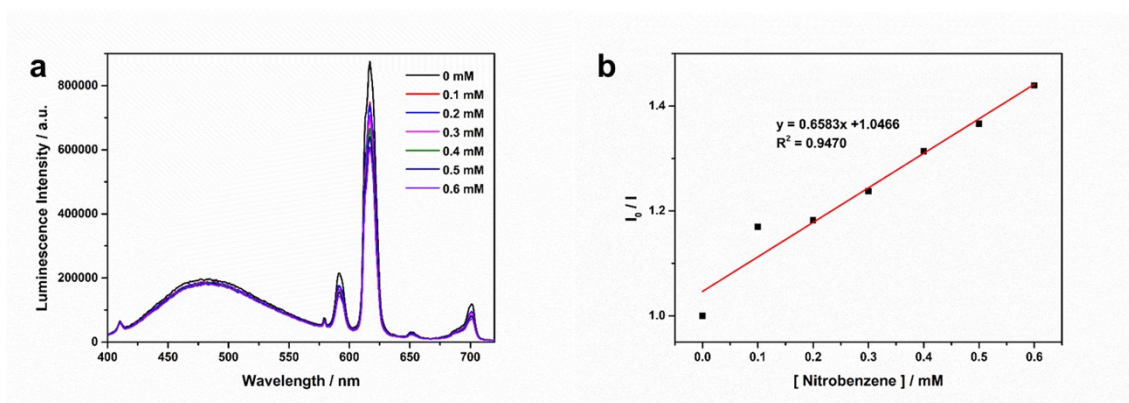

**Fig S15.** (a) The luminescence spectra of the Eu-MOF recorded with different concentrations of nitrobenzene (0-0.5 mM) in DMAC. (b) SV plot of  $I_0/I$  vs increasing concentrations of nitrobenzene.

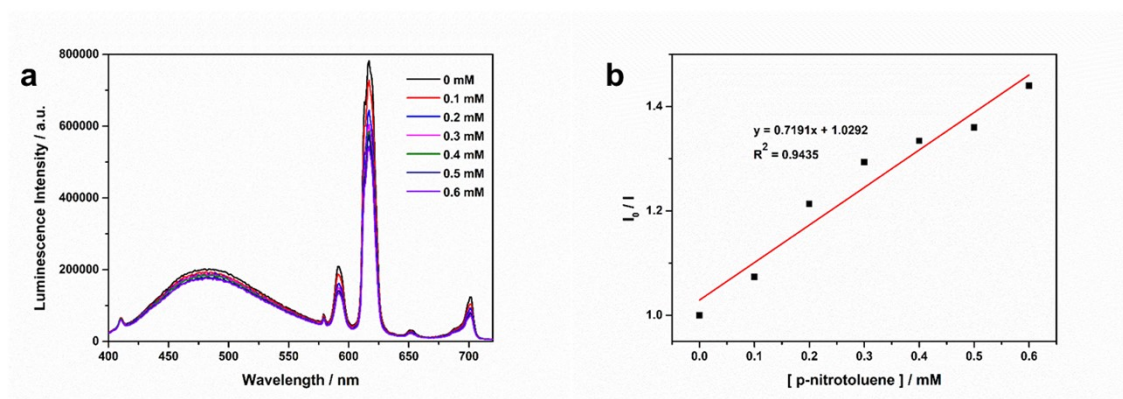

**Fig S16.** (a) The luminescence spectra of the Eu-MOF recorded with different concentrations of p-nitrotoluene (0-0.5 mM) in DMAC. (b) SV plot of  $I_0/I$  vs increasing concentrations of p-nitrotoluene.

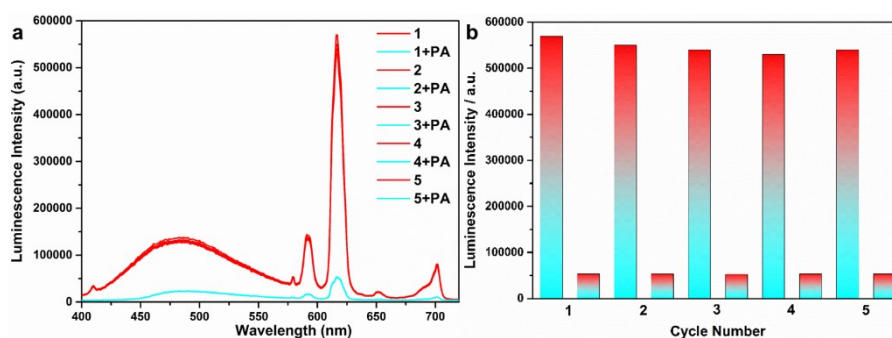

**Fig S17.** Reproducibility of the quenching ability of the Eu-MOF in DMAC and in the presence of PA (0.1 mM). (a) The luminescence spectra of the Eu-MOF in DMAC before and after adding PA; (b) Luminescence intensity at 617 nm before and after adding PA.

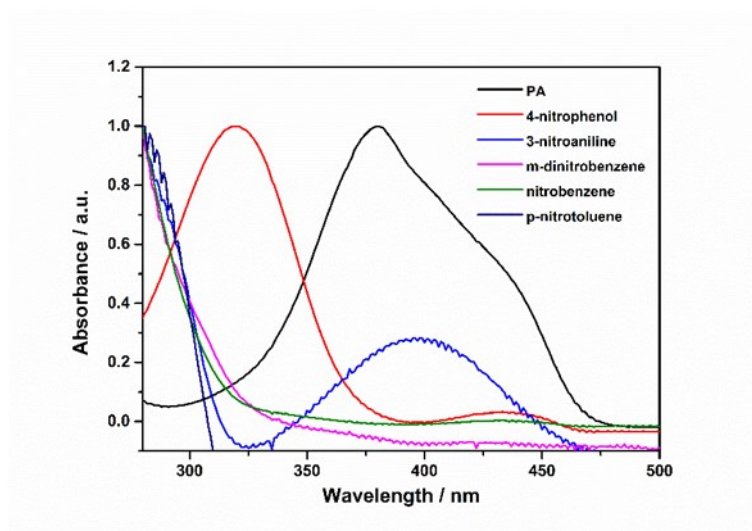

**Fig S18.** The UV-Vis absorption spectra of nitro explosives in DMAC.

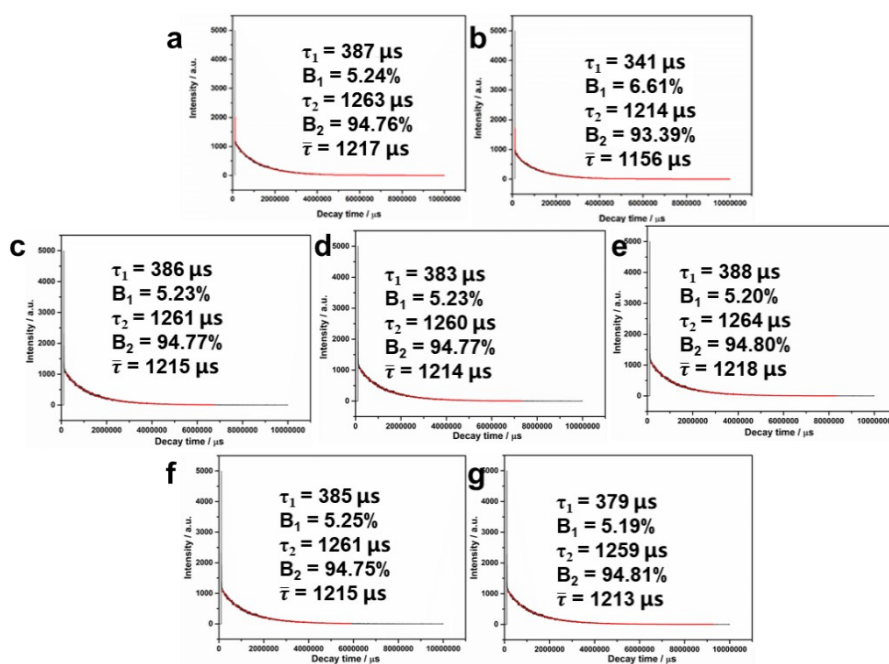

**Fig S19.** (a) The luminescence decay profiles of the Eu-MOF. (b-g) The luminescence decay profiles of the Eu-MOF mixed with 0.1 mM nitro explosives (PA, p-nitrophenol, 3-nitroaniline, m-dinitrobenzene, nitrobenzene, p-nitrotoluene).

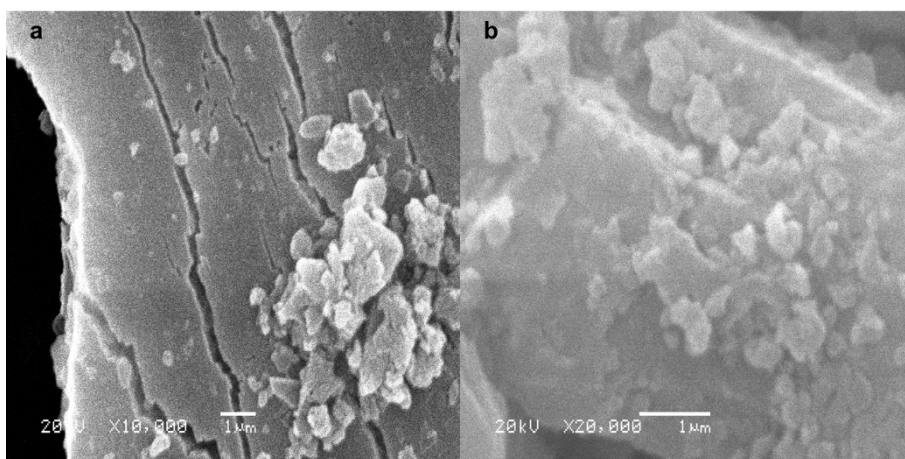

**Fig S20.** The SEM image of the Eu-MOF before (a) and after (b) detecting PA.

**Table S1** Crystal data and structure refinement for the Eu-MOF

| Compound                         | Eu-MOF                        |
|----------------------------------|-------------------------------|
| Empirical formula                | $C_{91}H_{84.5}Eu_2N_9O_{25}$ |
| Formula weight                   | 2008.09                       |
| Temperature/K                    | 149.99(10)                    |
| Crystal system                   | monoclinic                    |
| Space group                      | $P2_1/c$                      |
| a/Å                              | 17.6657(4)                    |
| b/Å                              | 42.3715(9)                    |
| c/Å                              | 11.9739(3)                    |
| $\alpha/^\circ$                  | 90                            |
| $\beta/^\circ$                   | 96.227(2)                     |
| $\gamma/^\circ$                  | 90                            |
| Volume/Å <sup>3</sup>            | 8909.8(4)                     |
| Z                                | 4                             |
| $\rho_{\text{calc}}/\text{cm}^3$ | 1.497                         |
| $\mu/\text{mm}^{-1}$             | 1.476                         |
| F(000)                           | 4078.0                        |

|                                        |                                                                |
|----------------------------------------|----------------------------------------------------------------|
| Crystal size/mm <sup>3</sup>           | 0.11 × 0.08 × 0.06                                             |
| Radiation                              | Mo K $\alpha$ ( $\lambda$ = 0.71073)                           |
| 2 $\Theta$ range for data collection/° | 3.554 to 62.002                                                |
| Index ranges                           | -23 ≤ h ≤ 20, -58 ≤ k ≤ 50, -16 ≤ l ≤ 13                       |
| Reflections collected                  | 70046                                                          |
| Independent reflections                | 22526 [R <sub>int</sub> = 0.0440, R <sub>sigma</sub> = 0.0515] |
| Data/restraints/parameters             | 22526/12/1177                                                  |
| Goodness-of-fit on F <sup>2</sup>      | 1.047                                                          |
| Final R indexes [I ≥ 2 $\sigma$ (I)]   | R <sub>1</sub> = 0.0428, wR <sub>2</sub> = 0.0938              |
| Final R indexes [all data]             | R <sub>1</sub> = 0.0624, wR <sub>2</sub> = 0.1014              |

$$^aR_1 = \Sigma(|F_o| - |F_c|) / \Sigma|F_o|; wR_2 = [\Sigma w(|F_o| - |F_c|)^2 / \Sigma w F_o^2]^{1/2}$$

**Table S2** The bond length for the Eu-MOF

| Atom   | Atom               | Length/Å |
|--------|--------------------|----------|
| Eu(01) | O(11)              | 2.330(2) |
| Eu(01) | O(12)              | 2.342(2) |
| Eu(01) | O(13)              | 2.337(3) |
| Eu(01) | O(18) <sup>2</sup> | 2.385(2) |
| Eu(01) | O(19) <sup>3</sup> | 2.375(2) |
| Eu(01) | O(20) <sup>2</sup> | 2.386(3) |
| Eu(01) | O(21) <sup>3</sup> | 2.367(3) |
| Eu(02) | O(1) <sup>5</sup>  | 2.425(2) |
| Eu(02) | O(2) <sup>5</sup>  | 2.520(2) |
| Eu(02) | O(5)               | 2.647(2) |
| Eu(02) | O(5) <sup>4</sup>  | 2.525(2) |
| Eu(02) | O(6)               | 2.409(2) |
| Eu(02) | O(7)               | 2.480(2) |
| Eu(02) | O(8)               | 2.403(3) |

|        |       |          |
|--------|-------|----------|
| Eu(02) | O(9)  | 2.354(2) |
| Eu(02) | O(10) | 2.411(2) |

$${}^12\text{-X,1-Y,1-Z}; {}^2+\text{X,+Y,-1+Z}; {}^32\text{-X,1-Y,2-Z}; {}^41\text{-X,1-Y,1-Z}; {}^51\text{-X,1-Y,-Z}$$

**Table S3.** Calculated excited states and HOMO-LUMO energy levels of the free ligand

| Basic set     | 6-31G(d)                                      |                                               |                                               |                                               |                                               |                                               |
|---------------|-----------------------------------------------|-----------------------------------------------|-----------------------------------------------|-----------------------------------------------|-----------------------------------------------|-----------------------------------------------|
| Excited state | Triplet (ev)                                  |                                               |                                               |                                               |                                               | Singlet (ev)                                  |
|               | T <sub>1</sub>                                | T <sub>2</sub>                                | T <sub>3</sub>                                | T <sub>4</sub>                                | T <sub>5</sub>                                |                                               |
| Ligand        | 1.4771<br>839.39 nm<br>11913 cm <sup>-1</sup> | 3.1821<br>389.63 nm<br>25665 cm <sup>-1</sup> | 3.2108<br>386.15 nm<br>25897 cm <sup>-1</sup> | 3.4753<br>356.75 nm<br>28031 cm <sup>-1</sup> | 3.6120<br>343.26 nm<br>29132 cm <sup>-1</sup> | 2.3172<br>535.07 nm<br>18689 cm <sup>-1</sup> |

**Table S4.** Comparing the performance of the luminescent MOF thermometers in terms of temperature range, maximum relative sensitivity ( $S_r$ ) and corresponding temperature ( $T_m$ ).

| Luminescent MOF                                                                             | Temperature range (K) | $S_r$ (% K <sup>-1</sup> ) | $T_m$ (K)  | Ref.             |
|---------------------------------------------------------------------------------------------|-----------------------|----------------------------|------------|------------------|
| Eu <sub>0.37</sub> Tb <sub>0.63</sub> -BTC-a                                                | 313-473               | 0.68                       | 313        | 1 <sup>1</sup>   |
| Eu-H <sub>2</sub> FDC                                                                       | 20-320                | 2.7                        | 170        | 2 <sup>2</sup>   |
| ZJU-88 $\pi$ perylene                                                                       | 293-353               | 1.28                       | 293        | 3 <sup>3</sup>   |
| Nd <sub>0.577</sub> Yb <sub>0.423</sub> BDC-F <sub>4</sub>                                  | 293-313               | 1.20                       | 313        | 4 <sup>4</sup>   |
| Eu <sub>0.19</sub> Tb <sub>0.81</sub> PDDI                                                  | 313-473               | 0.37                       | 473        | 5 <sup>5</sup>   |
| Eu <sub>0.05</sub> Tb <sub>0.95</sub> BDC-OH                                                | 313-513               | 1.55                       | 440        | 6 <sup>6</sup>   |
| Tb <sub>0.99</sub> Eu <sub>0.01</sub> (BDC) <sub>1.5</sub> -(H <sub>2</sub> O) <sub>2</sub> | 290-320               | 0.31                       | 318        | 7 <sup>7</sup>   |
| EuTPTC-2OMe                                                                                 | 313-473               | 7.78                       | 313        | 8 <sup>8</sup>   |
| Eu <sub>0.05</sub> Tb <sub>0.95</sub> TPTC-2Me                                              |                       | 1.76                       | 353        |                  |
| Tb <sub>0.80</sub> Eu <sub>0.20</sub> BPDA                                                  | 298-318               | 1.19                       | 313        | 9 <sup>9</sup>   |
| TbTPTC                                                                                      | 313-473               | 1.05                       | 366        | 10 <sup>10</sup> |
| Gd <sub>0.985</sub> Eu <sub>0.015</sub> TPTC                                                |                       | 0.2                        | 473        |                  |
| Gd <sub>0.9995</sub> Eu <sub>0.0005</sub> TPTC                                              |                       | 1.5                        | 473        |                  |
| <b>The Eu-MOF</b>                                                                           | <b>120-400</b>        | <b>2.73</b>                | <b>400</b> | <b>This work</b> |

**Table S5.** Comparing the performance of the luminescent MOF detecting PA in terms of  $K_{sv}$ .

| Luminescent MOF                | $K_{sv}$ ( $M^{-1}$ ) | Ref.             |
|--------------------------------|-----------------------|------------------|
| Eu <sub>4</sub> L <sub>3</sub> | 2001                  | 11 <sup>11</sup> |
| TippMn                         | 118000                | 12 <sup>12</sup> |
| Eu <sub>2</sub> L <sub>3</sub> | 2912                  | 13 <sup>13</sup> |
| LnCPs 2                        | 26000                 | 14 <sup>14</sup> |
| TbL                            | 4995                  | 15 <sup>15</sup> |
| Pb-MOF                         | 43300                 | 16 <sup>16</sup> |
| Zn-MOF                         | 69500                 | 17 <sup>17</sup> |
| Dy-MOF                         | 85500                 | 18 <sup>18</sup> |
| <b>The Eu-MOF</b>              | <b>53339</b>          | <b>This work</b> |

**Table S6.** S-V equations and quenching effect constant ( $K_{sv}$ ) of various nitro explosives for the Eu-MOF

| nitro explosives | S-V equation            | $K_{sv}$ ( $M^{-1}$ ) |
|------------------|-------------------------|-----------------------|
| picric acid      | $y = 53.3386x + 0.9377$ | 53339                 |
| p-nitrophenol    | $y = 3.6096x + 0.8774$  | 3610                  |
| 3-nitroaniline   | $y = 2.1678x + 0.9761$  | 2168                  |
| m-dinitrobenzene | $y = 0.8406x + 0.9854$  | 841                   |
| nitrobenzene     | $y = 0.6583x + 1.0466$  | 658                   |
| p-nitrotoluene   | $y = 0.7191x + 1.0292$  | 719                   |

## References

- 1 H. Wang, D. Zhao, Y. Cui, Y. Yang and G. Qian, A Eu/Tb-mixed MOF for luminescent high-temperature sensing, *Journal of Solid State Chemistry*, 2017, **246**, 341–345.
- 2 L. Li, Y. Zhu, X. Zhou, C. D. S. Brites, D. Ananias, Z. Lin, F. A. A. Paz, J. Rocha, W. Huang and L. D. Carlos, Visible-Light Excited Luminescent Thermometer Based on Single Lanthanide Organic Frameworks, *Adv. Funct. Mater.*, 2016, **26**, 8677–8684.
- 3 Y. Cui, R. Song, J. Yu, M. Liu, Z. Wang, C. Wu, Y. Yang, Z. Wang, B. Chen and G. Qian, Dual-emitting MOF-dye composite for ratiometric temperature sensing, *Advanced materials (Deerfield Beach, Fla.)*, 2015, **27**, 1420–1425.
- 4 X. Lian, D. Zhao, Y. Cui, Y. Yang and G. Qian, A near infrared luminescent metal-organic framework for temperature sensing in the physiological range, *Chemical communications (Cambridge, England)*, 2015, **51**, 17676–17679.
- 5 D. Zhao, H. Wang and G. Qian, Synthesis, structure and temperature sensing of a lanthanide-organic framework constructed from a pyridine-containing tetracarboxylic acid ligand, *CrystEngComm*, 2018, **20**, 7395–7400.
- 6 T. Xia, Z. Shao, X. Yan, M. Liu, L. Yu, Y. Wan, D. Chang, J. Zhang and D. Zhao, Tailoring the triplet level of isomorphous Eu/Tb mixed MOFs for sensitive temperature sensing, *Chemical communications (Cambridge, England)*, 2021, **57**, 3143–3146.
- 7 A. Cadiau, C. D. S. Brites, P. M. F. J. Costa, R. A. S. Ferreira, J. Rocha and L. D. Carlos, Ratiometric nanothermometer based on an emissive Ln<sup>3+</sup>-organic framework, *ACS nano*, 2013, **7**, 7213–7218.
- 8 J. Liu, X. Han, Y. Lu, S. Wang, D. Zhao and C. Li, Isostructural Single- And Dual-Lanthanide Metal-Organic Frameworks Based On Substituent-Group-Modifying Tetracarboxylate Ligands for Ratiometric Temperature Sensing, *Inorganic chemistry*, 2021, **60**, 4133–4143.
- 9 D. Zhao, X. Rao, J. Yu, Y. Cui, Y. Yang and G. Qian, Design and Synthesis of an MOF Thermometer with High Sensitivity in the Physiological Temperature Range, *Inorganic chemistry*, 2015, **54**, 11193–11199.
- 10 S. Wang, J. Jiang, Y. Lu, J. Liu, X. Han, D. Zhao and C. Li, Ratiometric fluorescence temperature sensing based on single- and dual-lanthanide metal-organic frameworks, *Journal of Luminescence*, 2020, **226**, 117418.
- 11 W. Liu, X. Huang, C. Xu, C. Chen, L. Yang, W. Dou, W. Chen, H. Yang and W. Liu, A Multi-responsive Regenerable Europium-Organic Framework Luminescent Sensor for Fe<sup>3+</sup> CrVI Anions, and Picric Acid, *Chemistry (Weinheim an der Bergstrasse, Germany)*, 2016, **22**, 18769–18776.
- 12 Y. Zou, K. Huang, X. Zhang, D. Qin and B. Zhao, Tetraphenylpyrazine-Based Manganese

- Metal-Organic Framework as a Multifunctional Sensor for Cu<sup>2+</sup>, Cr<sup>3+</sup>, MnO<sub>4</sub><sup>-</sup>, and 2,4,6-Trinitrophenol and the Construction of a Molecular Logical Gate, *Inorganic chemistry*, 2021, **60**, 11222–11230.
- 13 W. Liu, C. Chen, Z. Wu, Y. Pan, C. Ye, Z. Mu, X. Luo, W. Chen and W. Liu, Construction of Multifunctional Luminescent Lanthanide MOFs by Hydrogen Bond Functionalization for Picric Acid Detection and Fluorescent Dyes Encapsulation, *ACS Sustainable Chem. Eng.*, 2020, **8**, 13497–13506.
- 14 Y. Liu, Q. Sun, H. Zhou, H. Gao, D. Li and Y. Li, One-dimensional Europium-coordination polymer as luminescent sensor for highly selective and sensitive detection of 2,4,6-trinitrophenol, *Spectrochimica acta. Part A, Molecular and biomolecular spectroscopy*, 2022, **264**, 120303.
- 15 W. Liu, X. Huang, C. Chen, C. Xu, J. Ma, L. Yang, W. Wang, W. Dou and W. Liu, Function-Oriented: The Construction of Lanthanide MOF Luminescent Sensors Containing Dual-Function Urea Hydrogen-Bond Sites for Efficient Detection of Picric Acid, *Chemistry (Weinheim an der Bergstrasse, Germany)*, 2019, **25**, 1090–1097.
- 16 S. Yu, K. Y. Zhang, J. X. Li, Y. Xiao, L. X. Sun, F. Y. Bai and Y. H. Xing, Three Pbx(COO)<sub>y</sub> Cluster Frameworks Based on a Flexible Triazinetricarboxylic Acid Ligand: Syntheses, Structures, and Fluorescent Sensing Application for Nitrophenols, *Inorganic chemistry*, 2021, **60**, 7887–7899.
- 17 Y.-J. Hu, Y.-M. Li, K. Zheng, W.-H. Zhang, Y.-L. Liu and H. Yang, Construction of a Zn(II)-containing MOF for highly selective detection of picric acid and inhibition of human glioma cell growth, *Journal of Molecular Structure*, 2020, **1202**, 127359.
- 18 S.-J. Fan, R. Sun, Y.-B. Yan, H.-B. Sun, S.-N. Pang and S.-D. Xu, A Dy(III)-organic framework as a fluorescent probe for highly selective detection of picric acid and treatment activity on human lung cancer cells, *Open Chemistry*, 2020, **18**, 1105–1116.
